# Supplementary material for: Insulin therapy maintains the performance of PVA-coated PCL grafts in a diabetic rat model
Source: Royal Society of Chemistry journal article supplement (doi:10.1039/d2bm00531j), 2022-01-01
Supplement: d2bm00531j2.pdf [file d2bm00531j2.pdf]

| Target       | Orientation | Sequence (5' to 3' )        | Reference                                                                                     |
|--------------|-------------|-----------------------------|-----------------------------------------------------------------------------------------------|
| Nos2         | Forward     | GAGGACCCAGAGACAAGCCC        | This paper                                                                                    |
|              | Reverse     | CTACAGCTCCGGGCATCGAA        |                                                                                               |
| Nos3         | Forward     | GTGGGCAGCATCACCTACGA        | This paper                                                                                    |
|              | Reverse     | GGCCGGCTCTGTAACCTCCT        |                                                                                               |
| S16 rRNA     | Forward     | AGAGTTTGATCATGGCTCAG        | Lane, D. J. (1991). 16S/23S rRNA sequencing, p. 115-175. In E. Stackebrandt and M. Goodfellow |
|              | Reverse     | TGCTGCCTCCCGTAGGAGTCTGGACCG |                                                                                               |
| TNF $\alpha$ | Forward     | TCTCATTCCTGCTCGTGGCG        | This paper                                                                                    |
|              | Reverse     | GCTTGGTGGTTTGCTACGACG       |                                                                                               |
| IL6          | Forward     | GCCCACCAGGAACGAAAGTC        | This paper                                                                                    |
|              | Reverse     | CCAAGAAGGCAACTGGCTGGA       |                                                                                               |
| IL1 $\beta$  | Forward     | CGTCCTCTGTGACTCGTGGG        | This paper                                                                                    |
|              | Reverse     | GGCCACAGGGATTTTGTCGT        |                                                                                               |
| Nox1         | Forward     | AACCACACGCTGAGAAAGCC        | This paper                                                                                    |
|              | Reverse     | CCACTCCAGTAAGGCCAGCA        |                                                                                               |
| Nox2         | Forward     | GGCCCTTTGGTACAGCCAGT        | This paper                                                                                    |
|              | Reverse     | AGCAGGTCTGCGAACCACTC        |                                                                                               |
| Rplp0        | Forward     | ACATCTCCCCCTTCTCCTTCGG      | This paper                                                                                    |
|              | Reverse     | CCACATTGCGGACACCCTCTA       |                                                                                               |
