# Supplementary figures and images for: Insulin therapy maintains the performance of PVA-coated PCL grafts in a diabetic rat model
Source: Royal Society of Chemistry journal article supplement (doi:10.1039/d2bm00531j), 2022-01-01

### Inflammatory cytokines

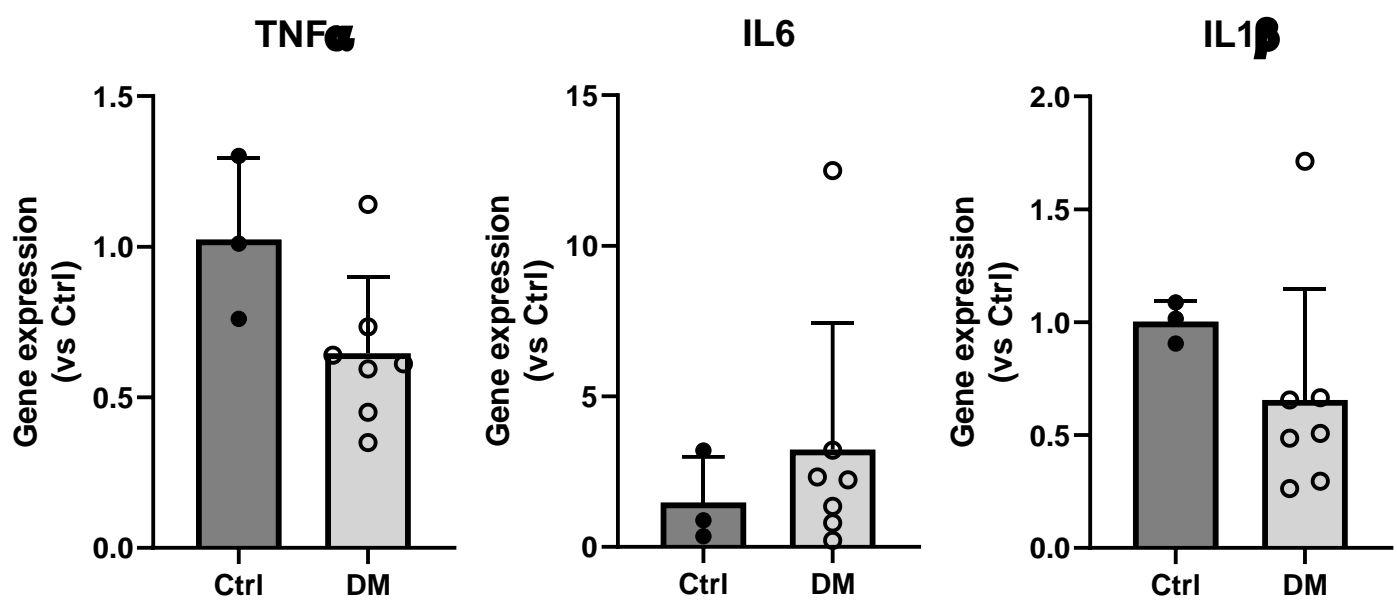

### NADPH oxidase

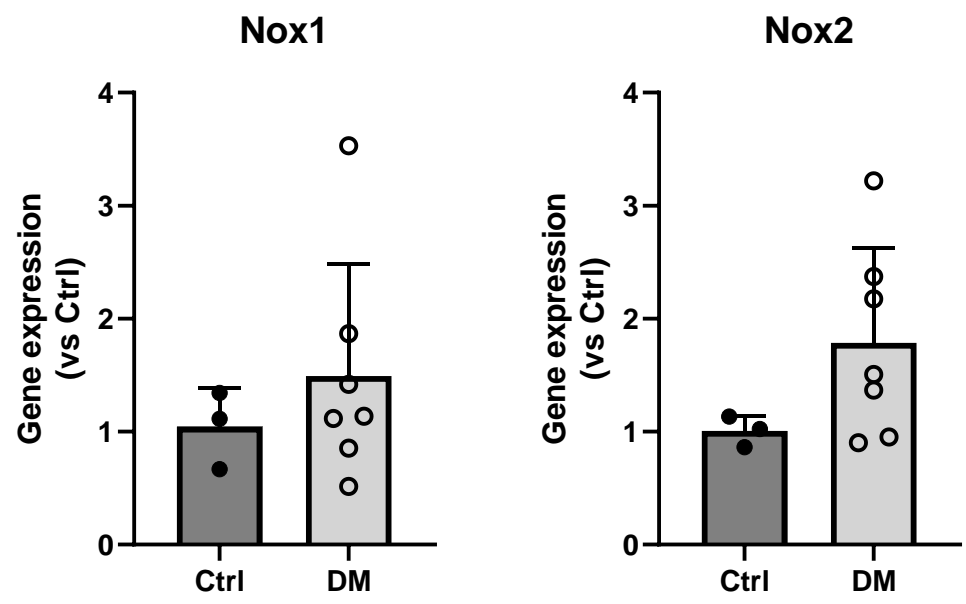

Supplement: d2bm00531j1.pdf [file d2bm00531j1.pdf]
